# Supplementary material for: Functional Transcriptome Analysis in ARSACS KO Cell Model Reveals a Role of Sacsin in Autophagy
Source: PubMed Central journal article supplement (PMC6695435; doi:10.1038/s41598-019-48047-x), 2019-08-15

# FUNCTIONAL TRANSCRIPTOME ANALYSIS IN ARSACS KO CELL MODEL REVEALS A ROLE OF SACSIN IN AUTOPHAGY

Federica Morani<sup>1\*</sup>, Stefano Doccini<sup>1</sup>, Roberto Sirica<sup>2</sup>, Marta Paterno<sup>2</sup>, Francesco Pezzini<sup>3</sup>, Ivana Ricca<sup>1</sup>, Alessandro Simonati<sup>3</sup>, Massimo Delledonne<sup>2</sup>, Filippo Maria Santorelli<sup>1\*</sup>

*<sup>1</sup>Molecular Medicine for Neurodegenerative and Neuromuscular Diseases Unit, IRCCS Stella Maris Foundation, Pisa 56128, Italy;*

*<sup>2</sup>Department of Biotechnology, University of Verona, Verona 37134, Italy;*

*<sup>3</sup>Neurology (Neuropathology and Child Neurology), Department of Neuroscience, Biomedicine and Movement, University of Verona, Verona 37134, Italy*

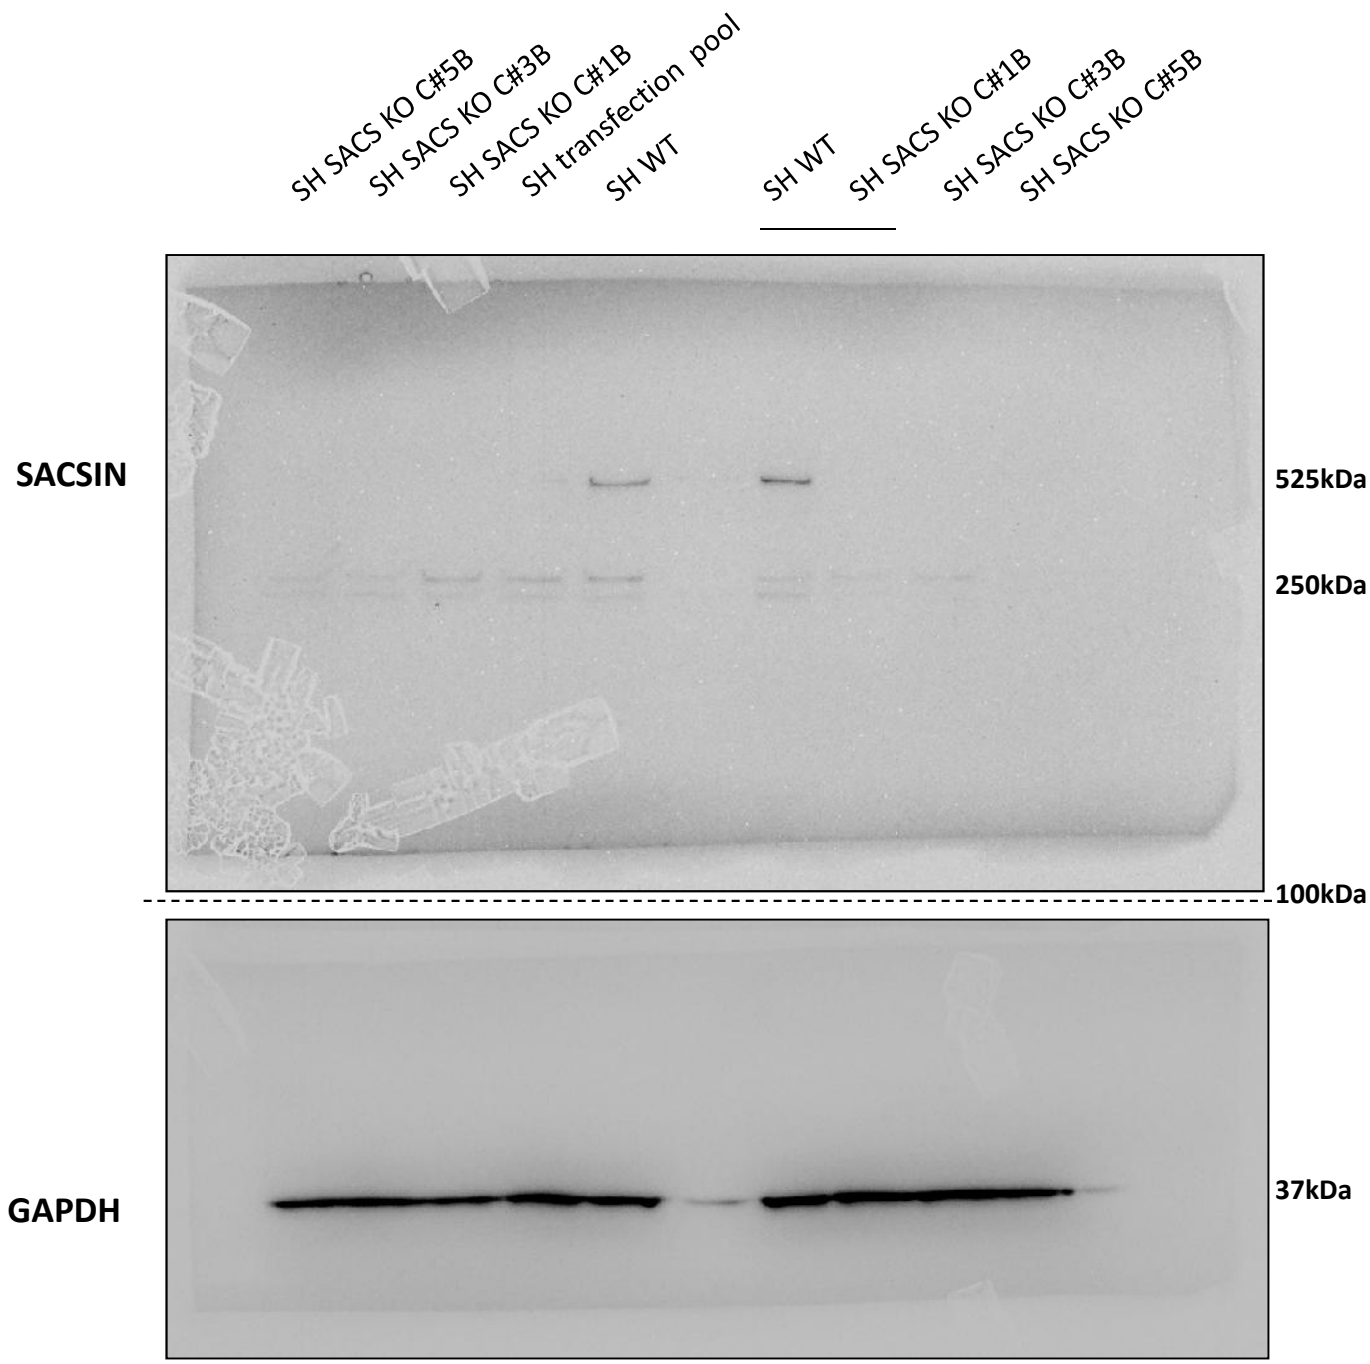

**Supplementary Information 1.** Full-length blots refer to Figure 1F and Supplementary Figure S1B. Dotted line indicates the cut on the PVDF-membrane.

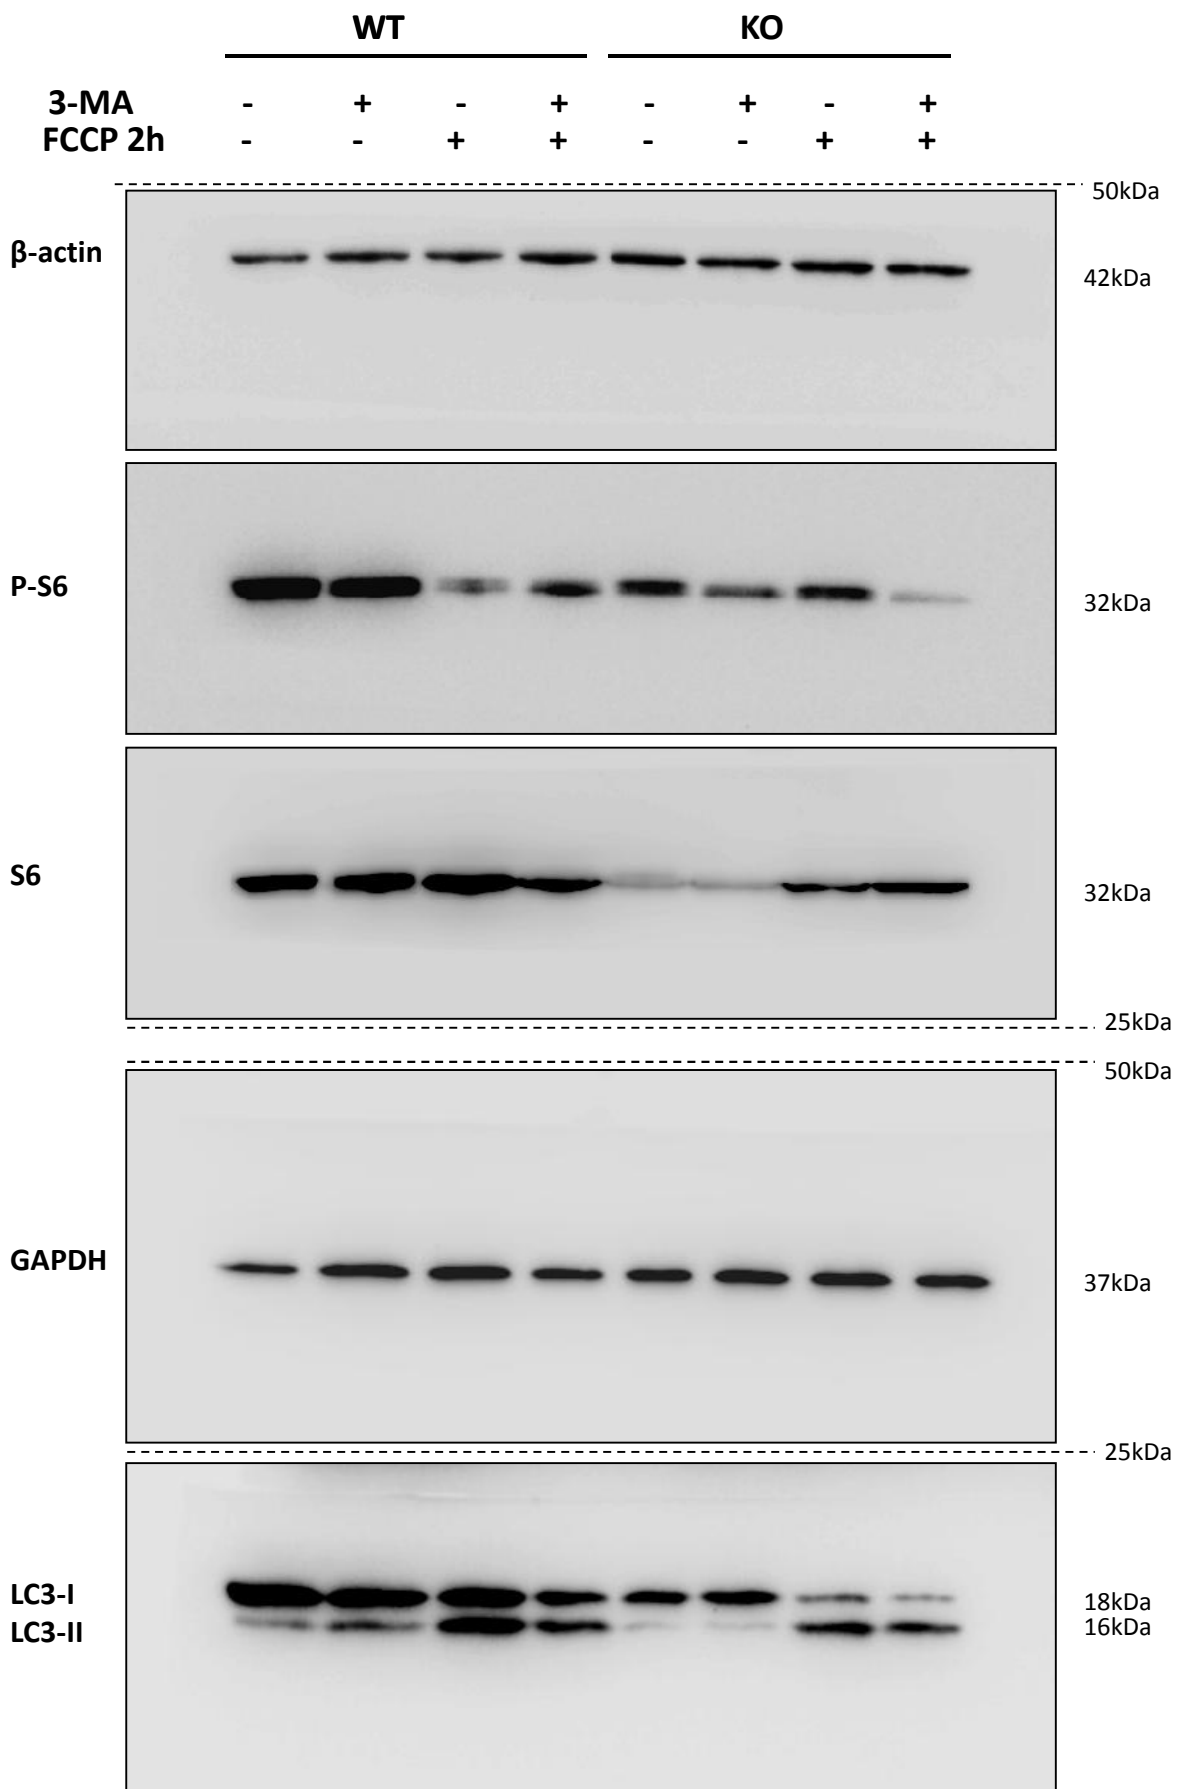

**Supplementary Information 2.** Full-length blots refer to Figure 4A. Dotted lines indicate the cut on the PVDF-membranes.

A

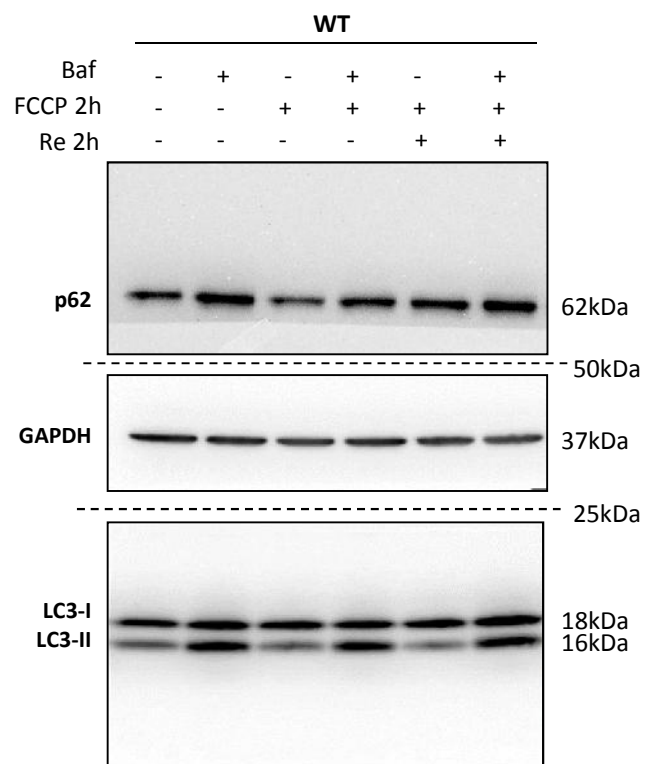

B

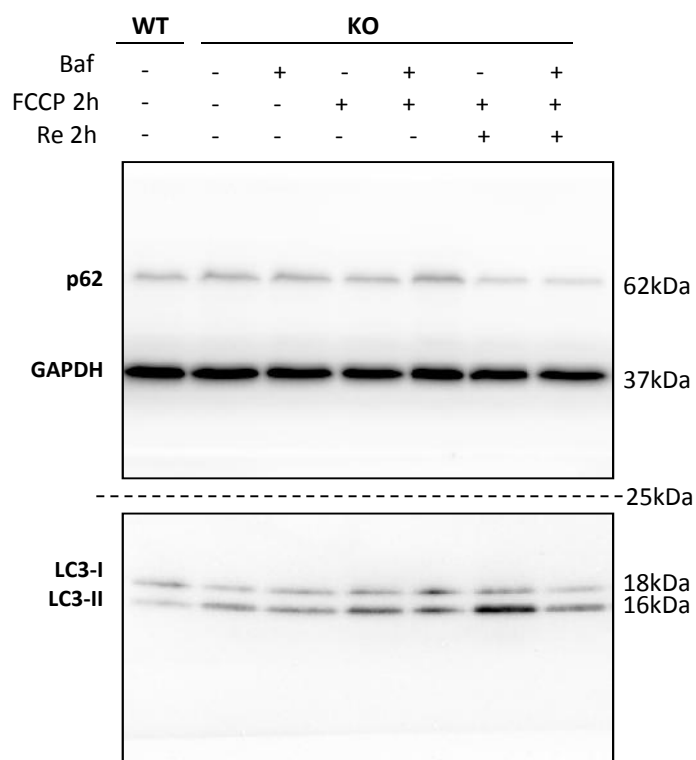

**Supplementary Information 3.** Full-length blots refer to Figure 5.  
Dotted lines indicate the cut on the PVDF-membrane.

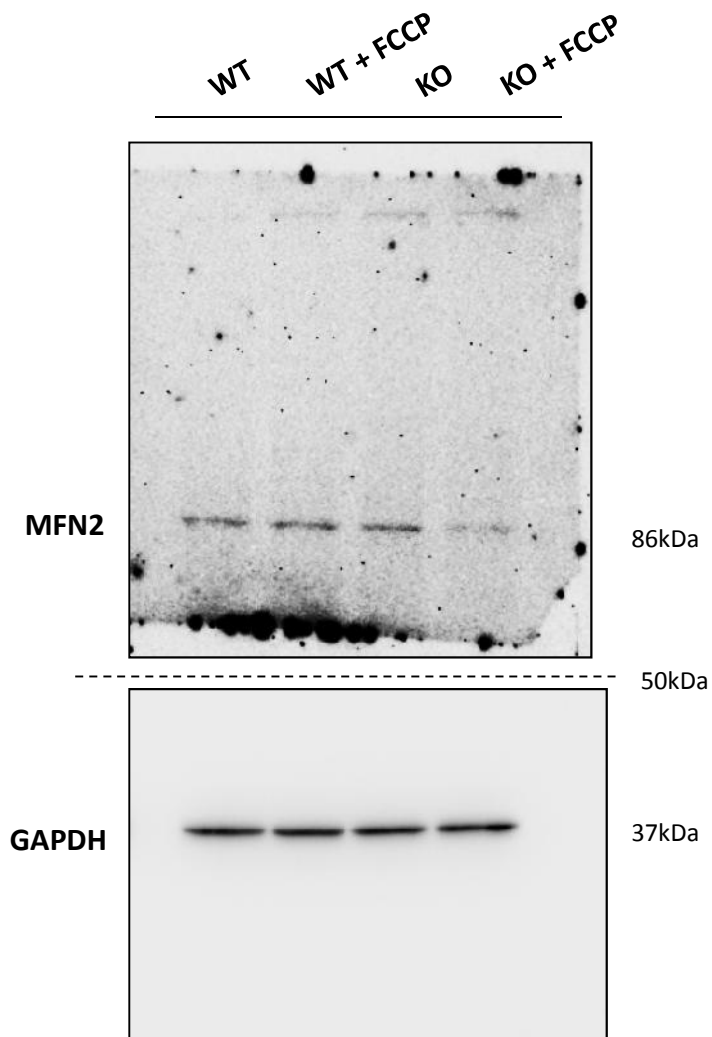

**Supplementary Information 4.** Full-length blots refer to Figure 7C. Dotted line indicates the cut on the PVDF-membrane.

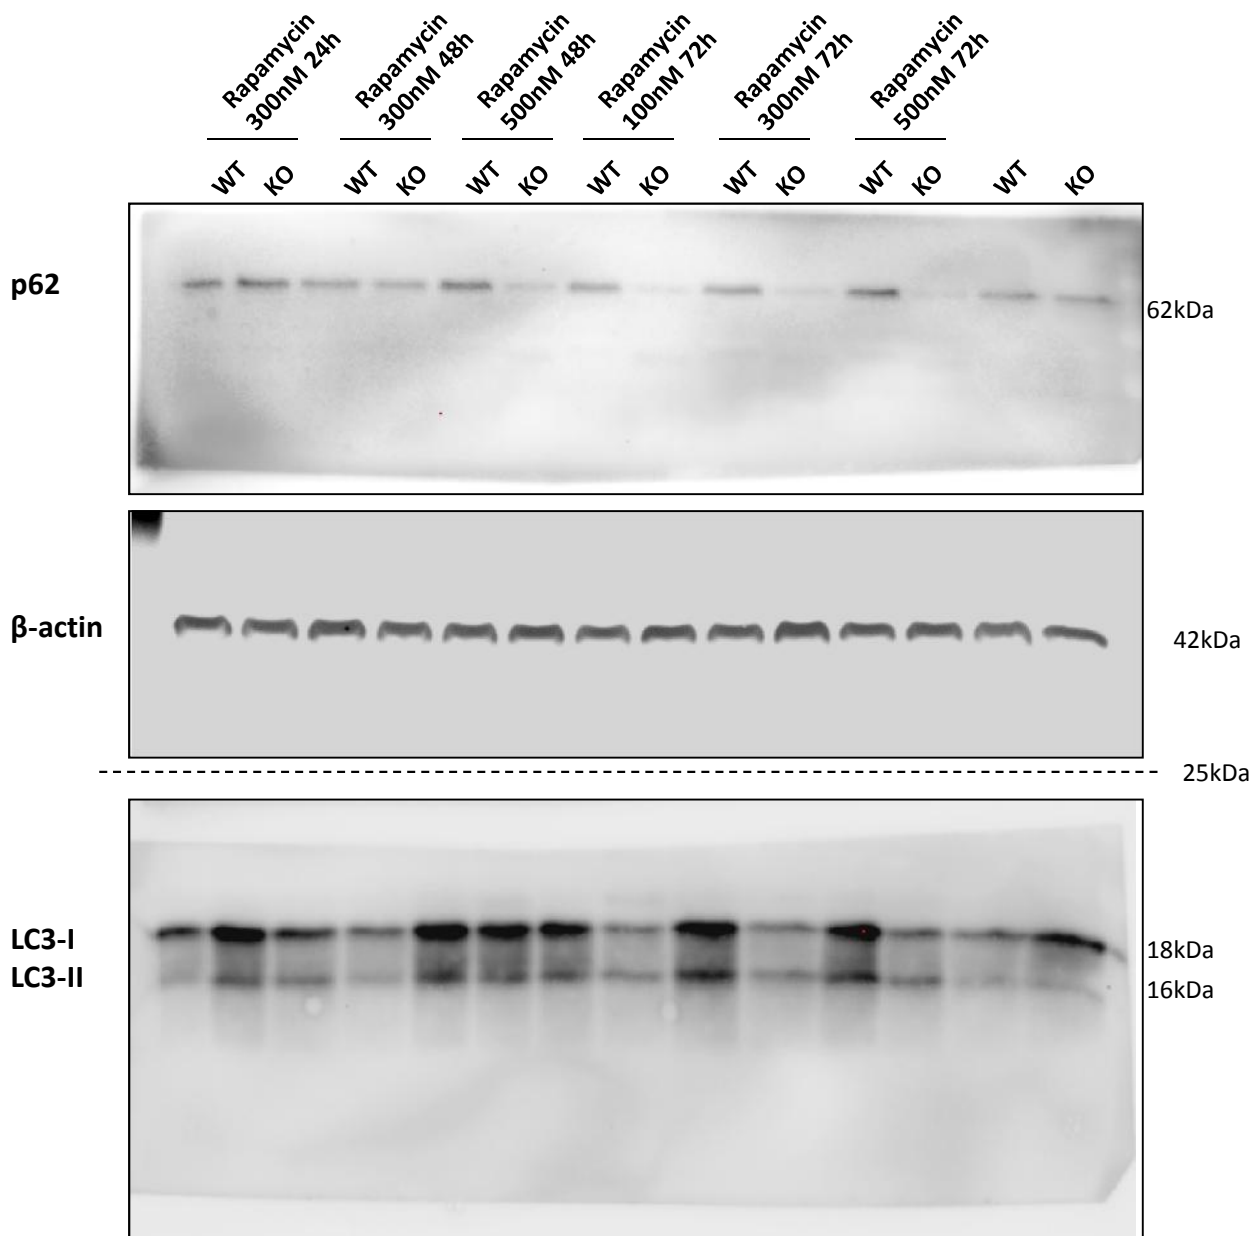

**Supplementary Information 5.** Full-length blots refer to Figure 10A.  
Dotted lines indicate the cut on the PVDF-membrane.

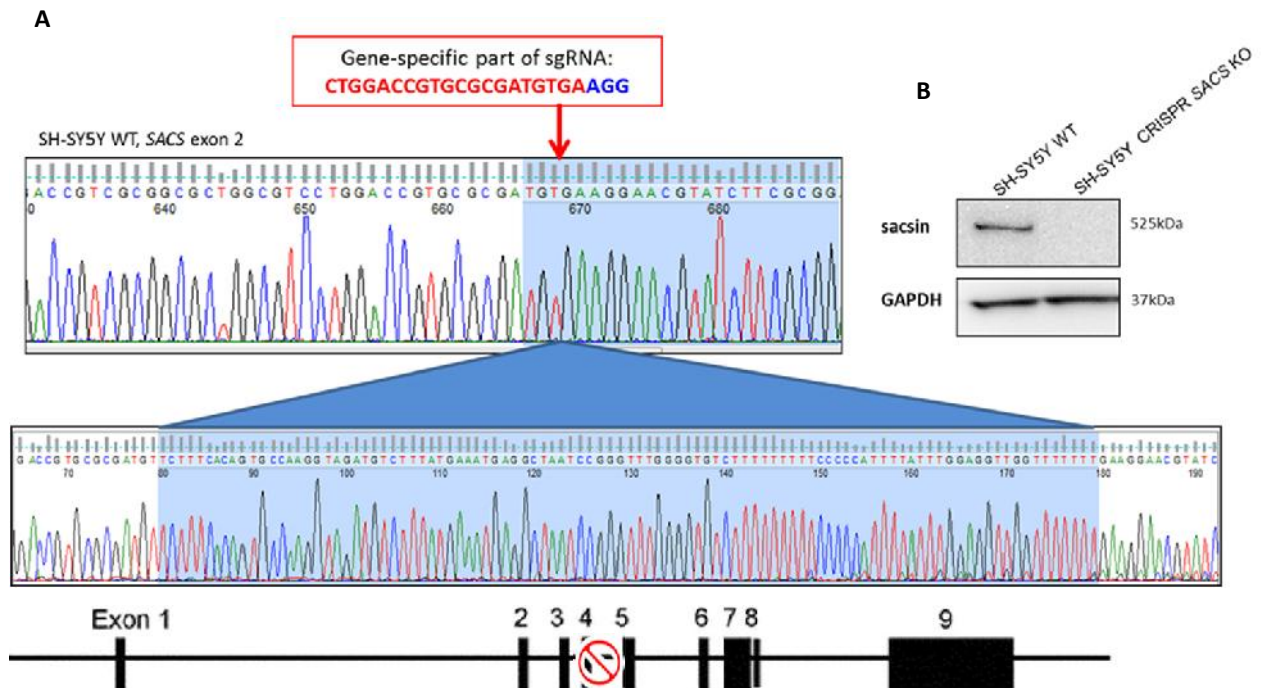

**Supplementary Figure S1. Characterization of sacsine KO cell line generated by CRISPR/Cas9 gene editing technology.** Genotype and protein expression of isolated clones from SH-SY5Y edited cells were verified by standard sequencing methods and Western blotting analyses. As shown in the figure the functional sgRNA was localized in exon 2 of the *SACS* gene. (A) Electropherogram analysis of the (B) The SH-SY5Y KO clone was characterized by a 100 bp insertion, resulting in a stop codon in exon 4. Sacsine protein levels, measured by Western blotting, were not detectable in KO cell line.

A

### Heatmap autophagy up-regulated DEGs

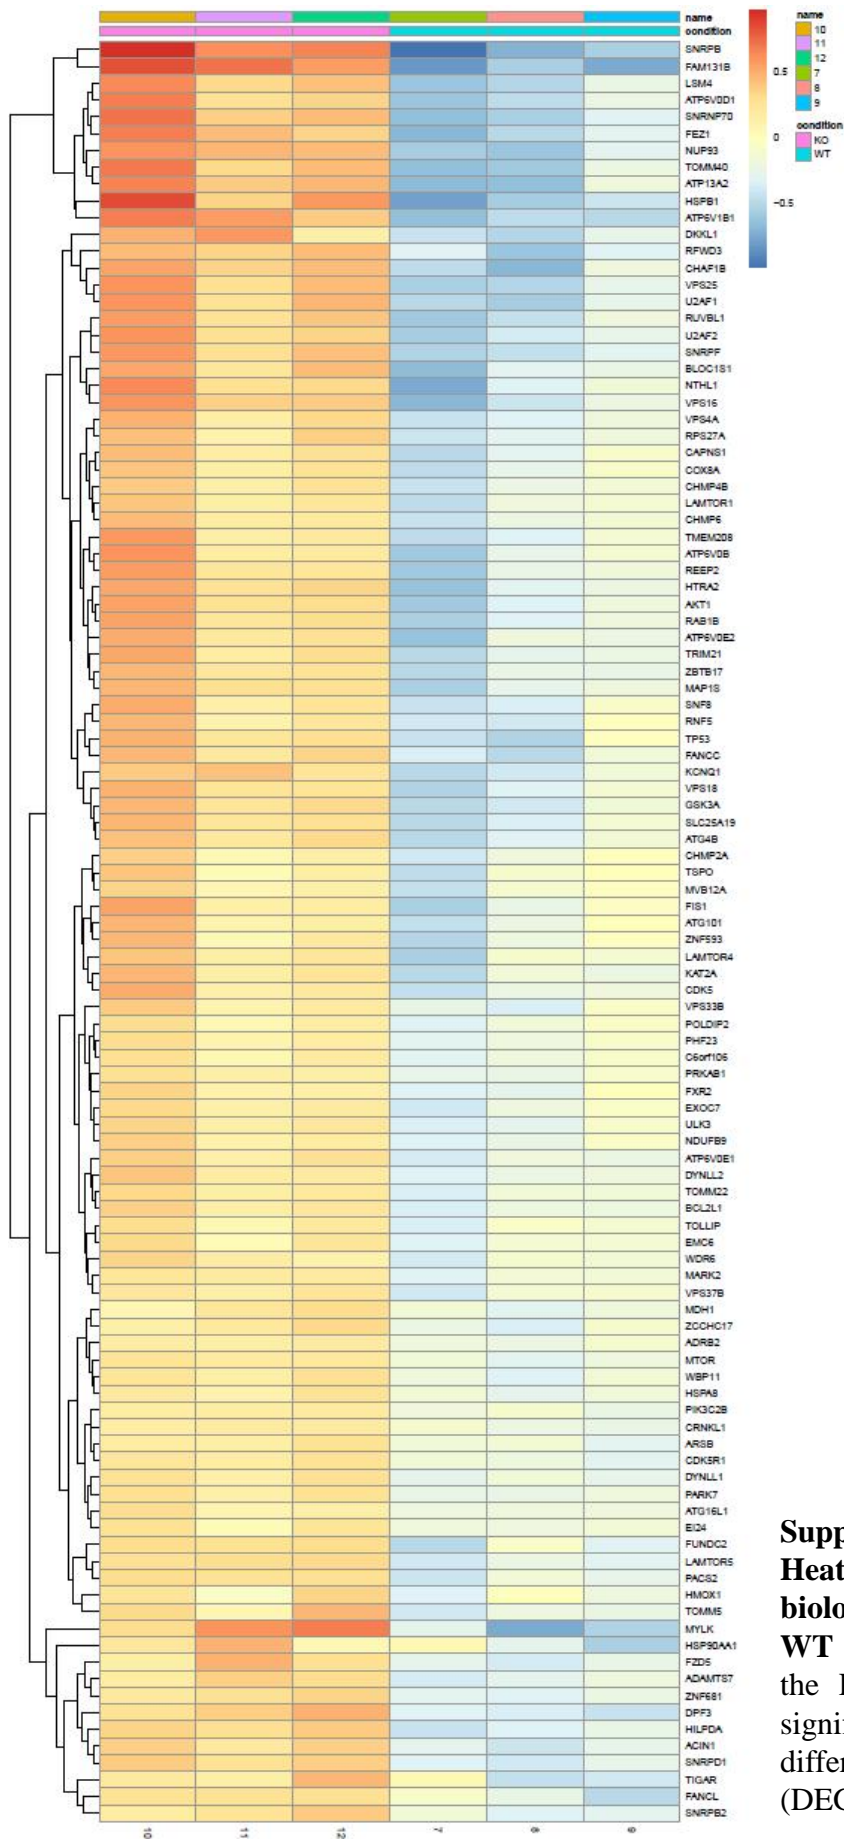

**Supplementary Figure S2A.** Heat map of autophagic biological process in KO vs WT cells. The figure shows the RNA-seq heat map for significantly up-regulated differentially expressed genes (DEGs).



B

### Heatmap autophagy down-regulated DEGs

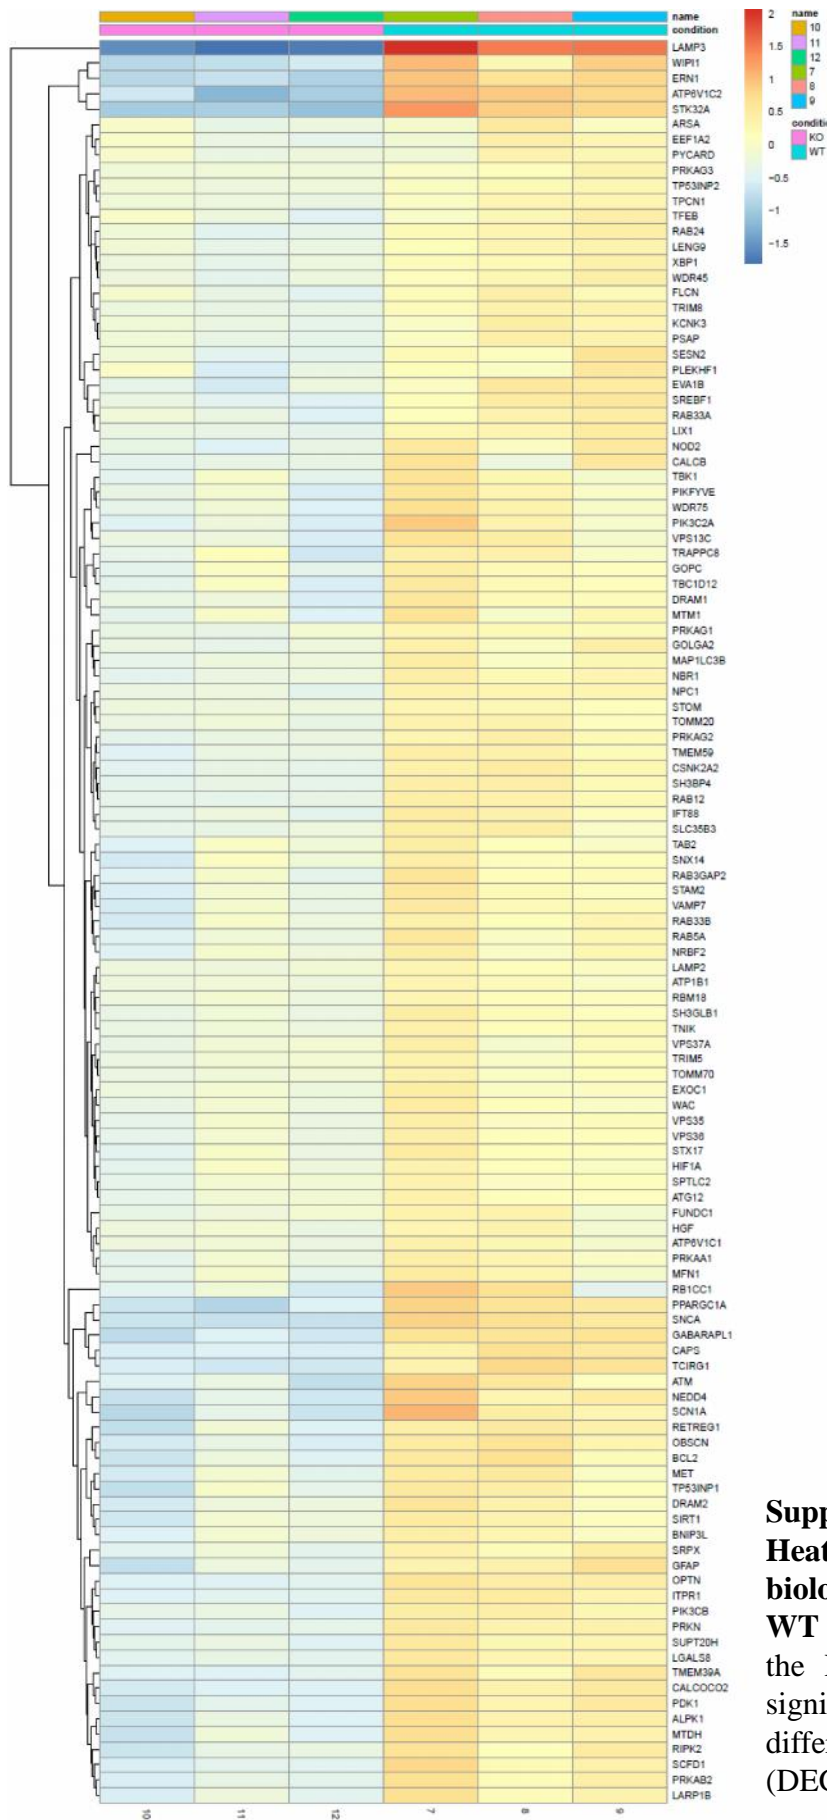

**Supplementary Figure S2B.** Heat map of autophagic biological process in KO vs WT cells. The figure shows the RNA-seq heat map for significantly down-regulated differentially expressed genes (DEGs).

### Heatmap oxidative phosphorylation

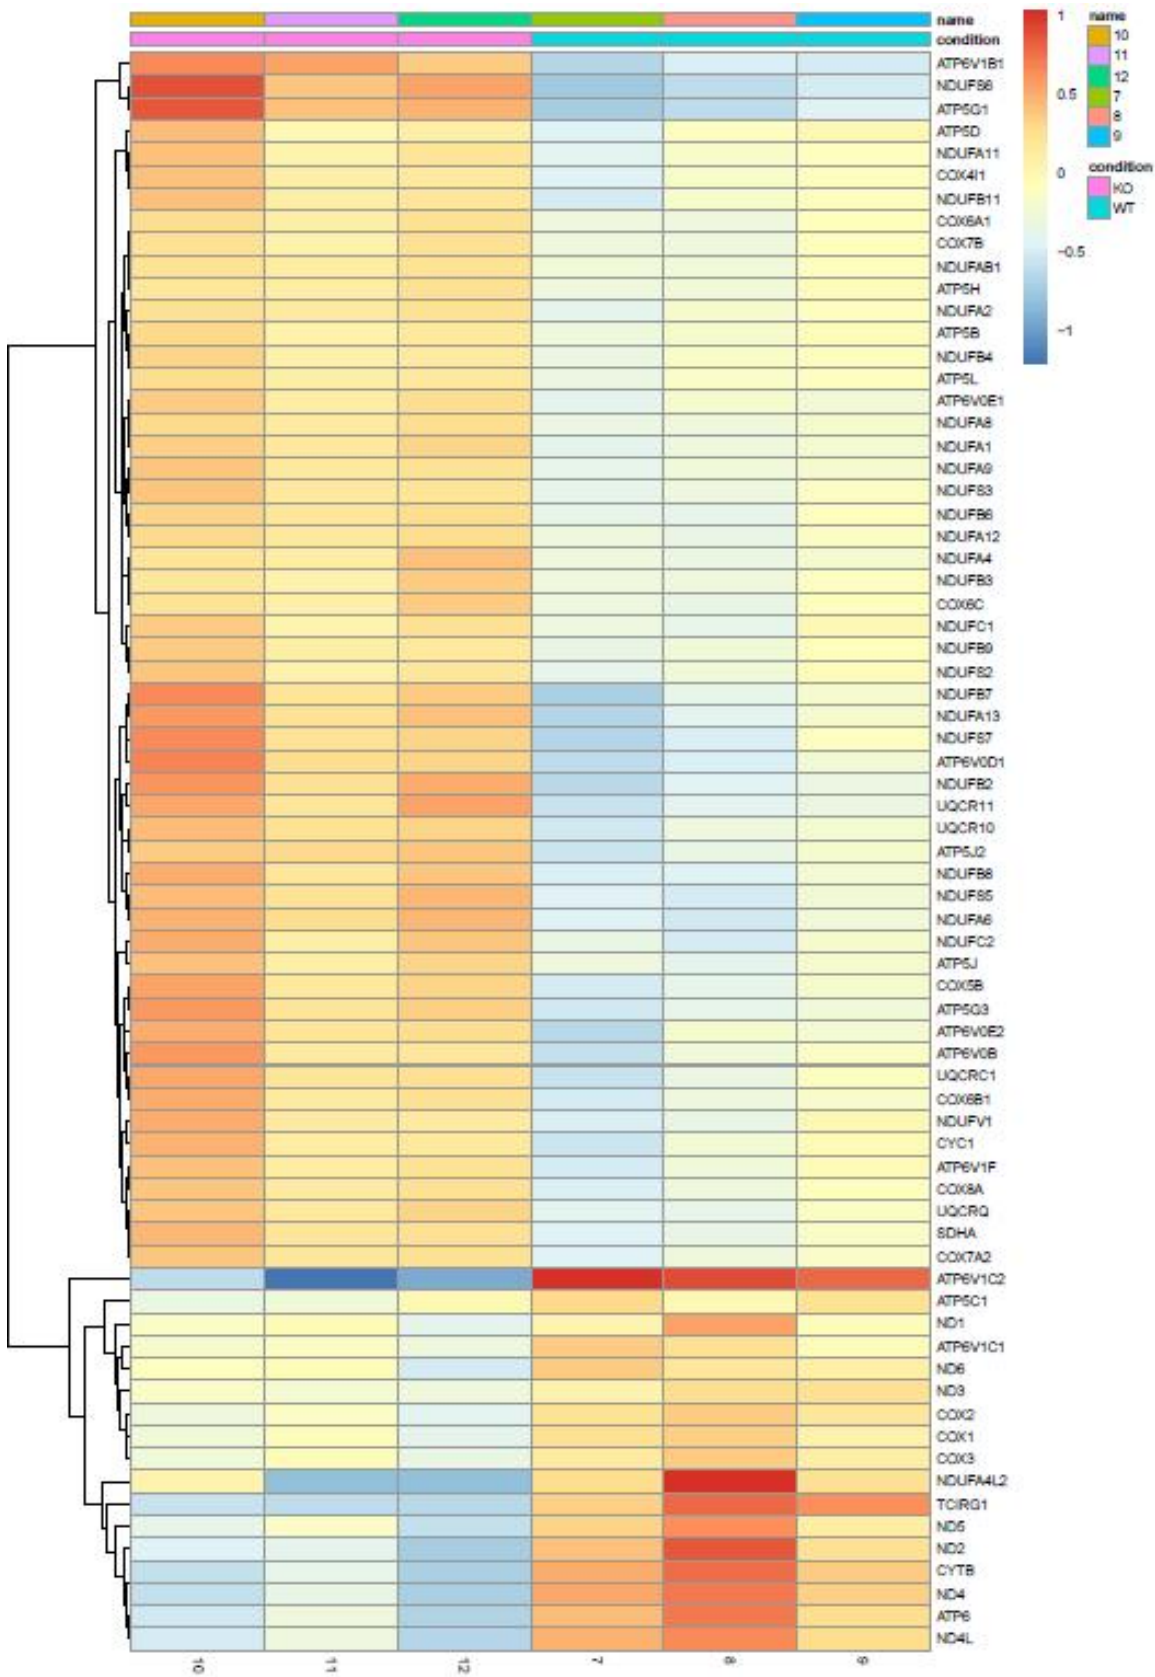

**Supplementary Figure S3. Heat map of oxidative phosphorylation process in KO vs WT cells.** The figure shows the RNA-seq heat map for oxidative metabolism genes.

## Apoptosis of central nervous system cells

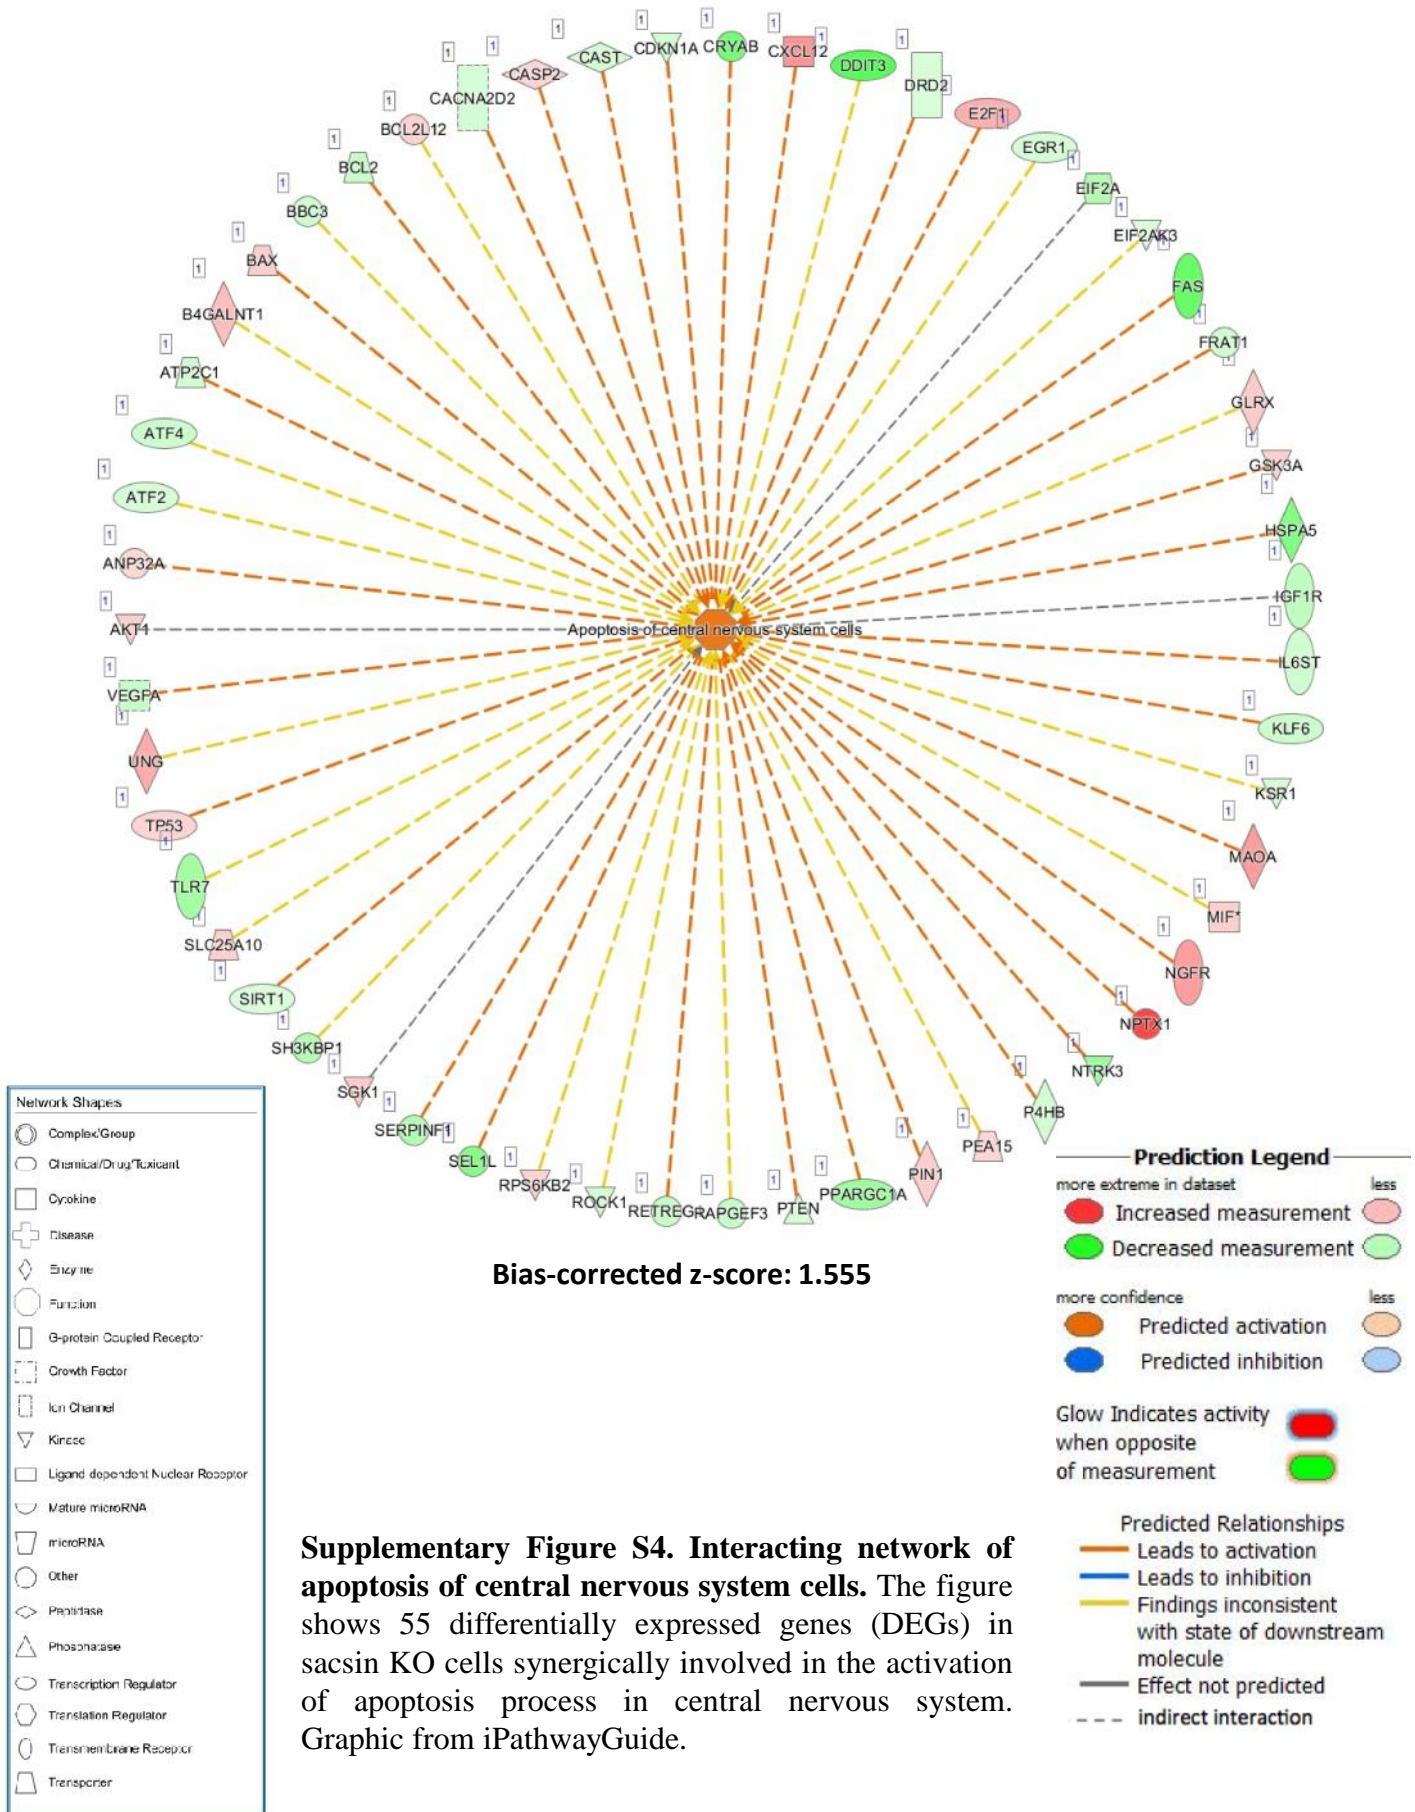

Supplement: 41598_2019_48047_MOESM1_ESM.pdf [file 41598_2019_48047_MOESM1_ESM.pdf]
